# Supplementary material for: Divalent metal ion-mediated assembly of spherical nucleic acids: the case study of Cu2+
Source: Royal Society of Chemistry journal article supplement (doi:10.1039/c5cp05202e), 2015-01-01
Supplement: c5cp05202e1.pdf [file c5cp05202e1.pdf]

Electronic Supplementary Information

# Divalent Metal Ion-Mediated Assembly of Spherical Nucleic Acids: The Case Study of Cu<sup>2+</sup>

*Jang Ho Joo and Jae-Seung Lee\**

Department of Materials Science and Engineering, Korea University

145 Anam-ro, Seongbuk-gu, Seoul, Republic of Korea, 136-701

E-mail : JSLEE79@korea.ac.kr

Fax: +82-2-928-3584

| M <sup>2+</sup>  | Slope (°C/mM) | R <sup>2</sup> |
|------------------|---------------|----------------|
| Cu <sup>2+</sup> | -46.4         | 0.9854         |
| Mg <sup>2+</sup> | 2.48          | 0.9758         |
| Cd <sup>2+</sup> | -1.27         | 0.9020         |
| Co <sup>2+</sup> | 1.49          | 0.9807         |
| Na <sup>+</sup>  | 0.495         | 0.9833         |
| Ni <sup>2+</sup> | 0.811         | 0.9496         |
| Zn <sup>2+</sup> | 1.14          | 0.9316         |
| Mn <sup>2+</sup> | 3.00          | 0.9948         |

**Table S1.** The slopes of the curves of  $T_m$  of duplex-interconnected SNA assemblies (**S1** and **S2**,  $[\text{Na}^+] = 0.15 \text{ M}$ ) against  $[\text{M}^{2+}]$ , and their  $R^2$  values (goodness-of-fit of linear regression). The slopes and  $R^2$  values were obtained by OriginPro 8 (OriginLab Corporation).

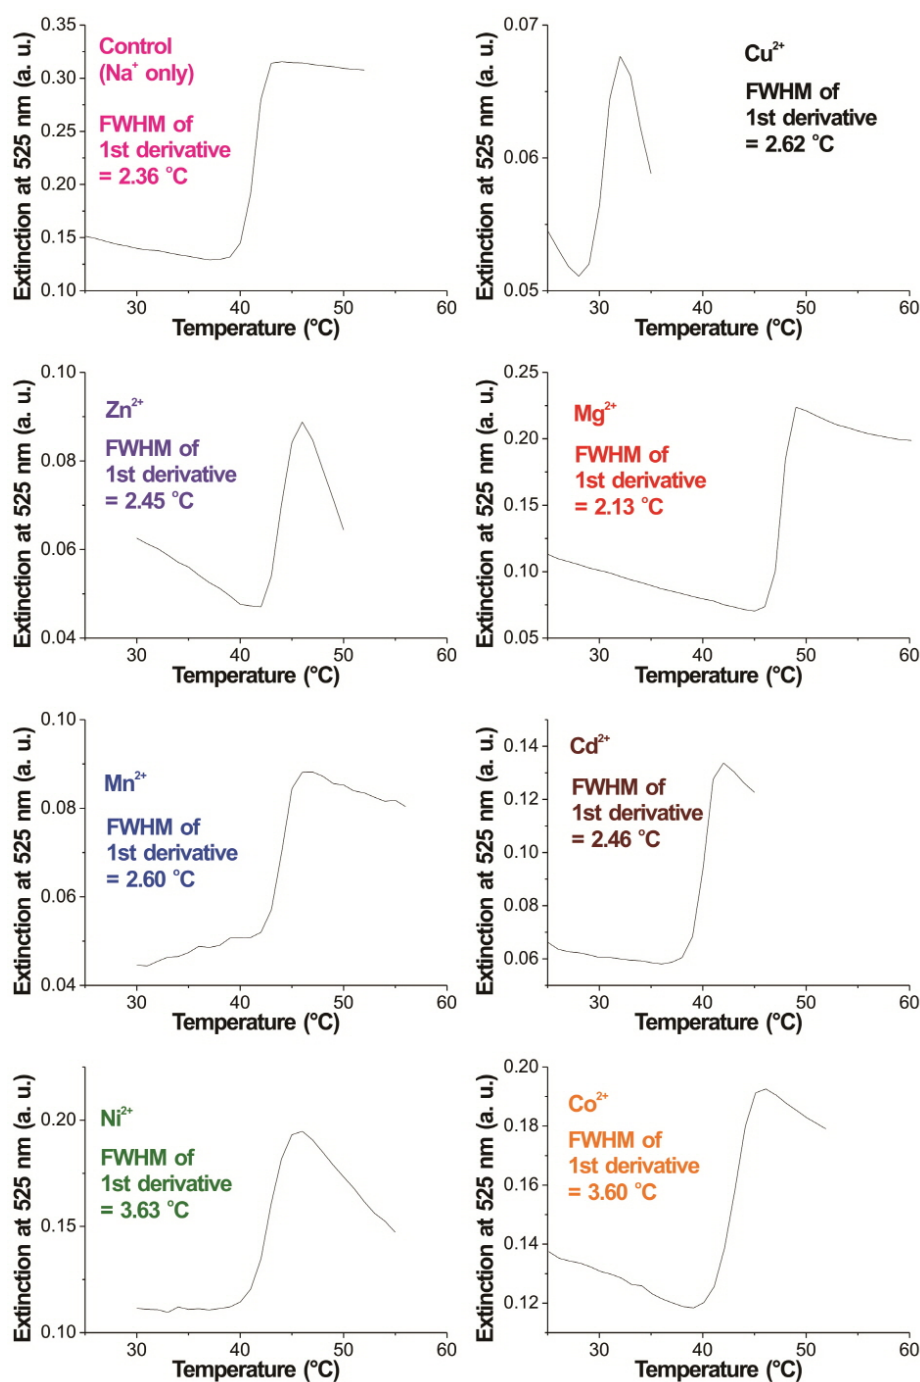

**Figure S1.** Melting transitions of duplex-interconnected SNA (**S1** and **S2**,  $[\text{Na}^+] = 0.15 \text{ M}$ ) assemblies and their full-width at half-maximum (FWHM) of the first derivatives in the presence of  $\text{M}^{2+}$  at 2 mM (2.5 mM in case of  $\text{Zn}^{2+}$  and  $\text{Ni}^{2+}$ , 1 mM in case of  $\text{Mn}^{2+}$ , and 0.25 mM in case of  $\text{Cu}^{2+}$ ). Note that the cooperativity of the melting transitions is generally reduced by  $\text{M}^{2+}$  (except  $\text{Mg}^{2+}$ ) compared to Control.

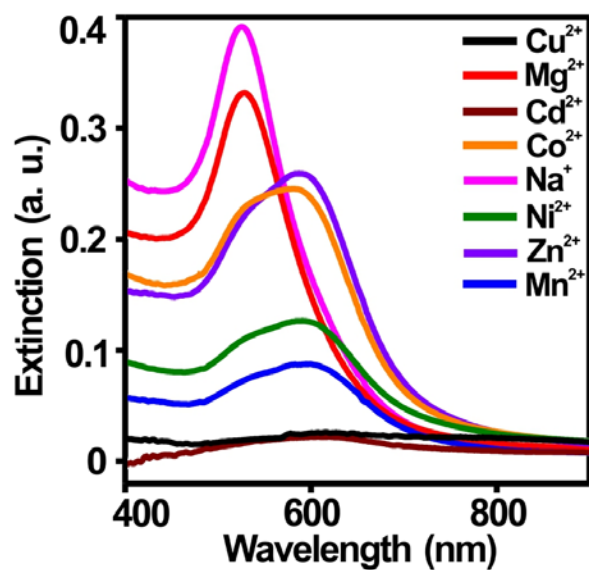

**Figure S2.** UV-vis spectra of SNAs (S1 at 1 nM) with various divalent metal ions ( $\text{Cu}^{2+}$ ,  $\text{Mg}^{2+}$ ,  $\text{Cd}^{2+}$ ,  $\text{Co}^{2+}$ ,  $\text{Ni}^{2+}$ ,  $\text{Zn}^{2+}$ , and  $\text{Mn}^{2+}$ ) and a monovalent metal ion ( $\text{Na}^+$ ). The final concentration of metal ions is 1 mM. Note that even single-type SNAs assemble into clusters and large aggregates in the presence of divalent metal ions, without any complementary SNAs or organic/polymeric materials.

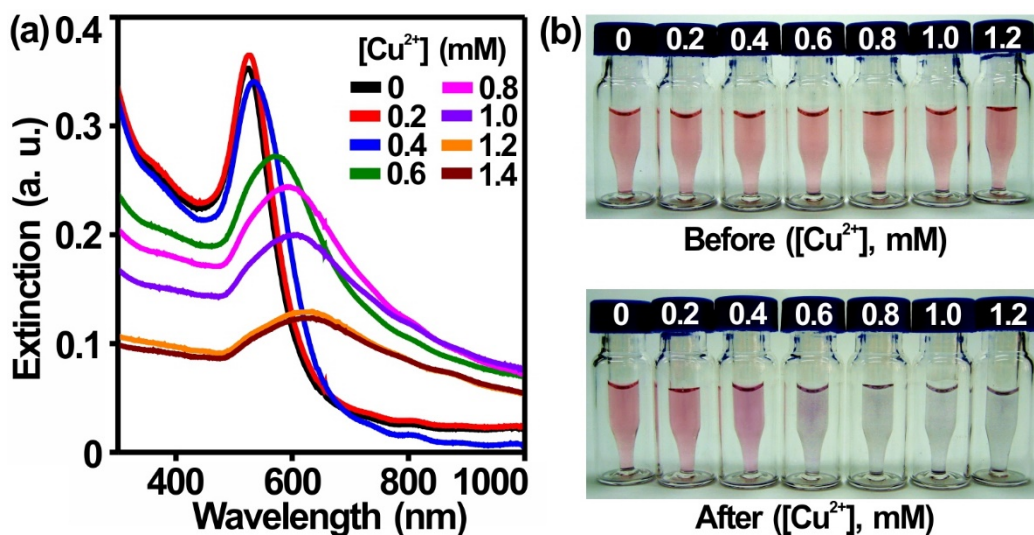

**Figure S3.** (a) UV-vis spectra of SNAs (S1) at various concentrations of  $\text{Cu}^{2+}$  from 0 to 1.4 mM after 12 hours of incubation. As the  $[\text{Cu}^{2+}]$  increases, the maximum extinction decreases while the wavelength where the maximum extinction takes place red-shifts (b) The SNA solutions before and after the addition of  $\text{Cu}^{2+}$  at various concentrations from 0 to 1.2 mM. The SNAs and  $\text{Cu}^{2+}$  were allowed to react for 12 hours, exhibiting clear color changes from red to blue, depending on the  $[\text{Cu}^{2+}]$ .

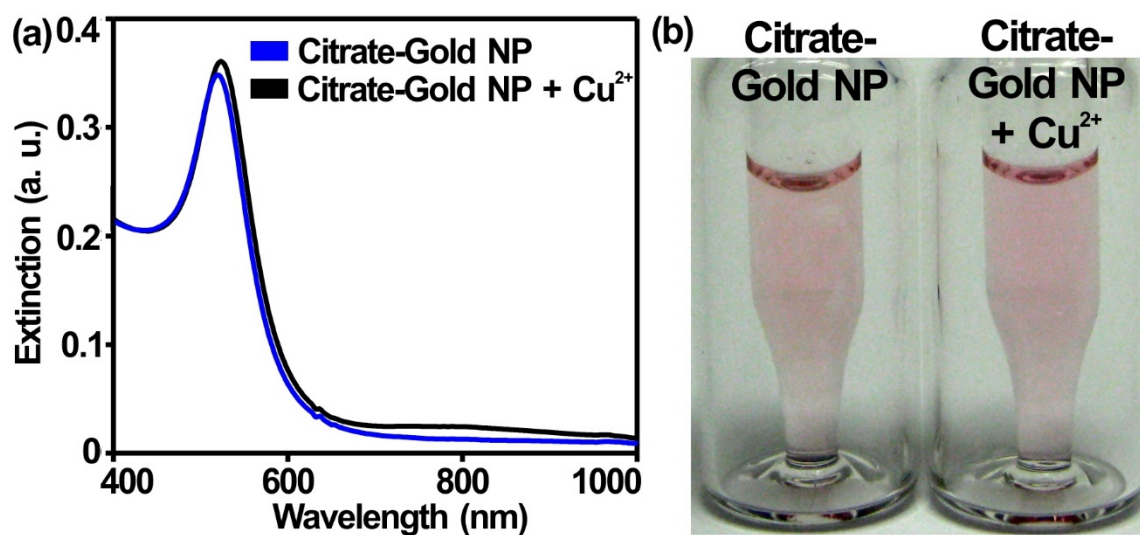

**Figure S4.** (a) UV-vis spectra of citrate-gold nanoparticles without Cu<sup>2+</sup> (blue) and with Cu<sup>2+</sup> at 1 mM (black). (b) The solutions of citrate-gold nanoparticles without Cu<sup>2+</sup> (left) and with Cu<sup>2+</sup> at 1 mM (right). Note that both the spectroscopic and visual data of both batches are in good agreement.

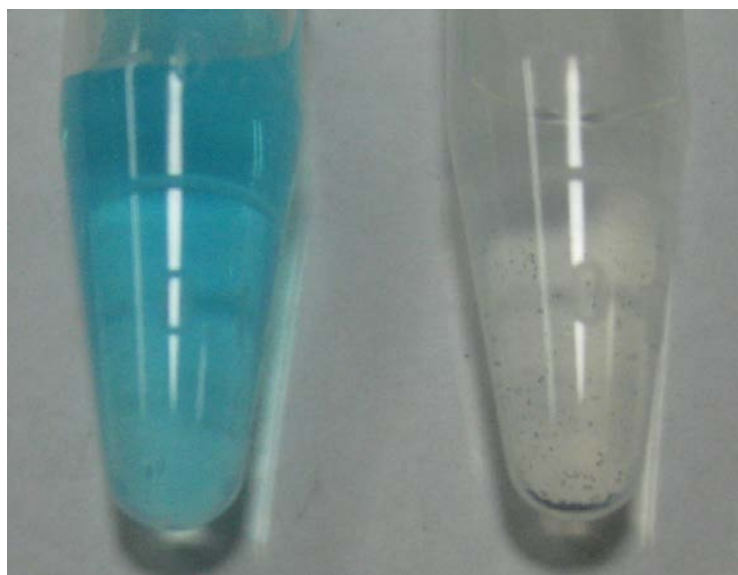

**Figure S5.** (Left) A solution containing dispersed SNAs (**S1**, 1 nM) and  $\text{Cu}^{2+}$  (500 mM). The blue color comes from the complex formation of  $\text{Cu}^{2+}$  with  $\text{H}_2\text{O}$ . The photo was taken as soon as the SNAs and  $\text{Cu}^{2+}$  were combined. (Right) A solution containing SNAs which were assembled by  $\text{Cu}^{2+}$  (500 mM) for 12 h, and transferred to pure water. Note that the SNAs are shown as precipitates on the bottom of the microtube.

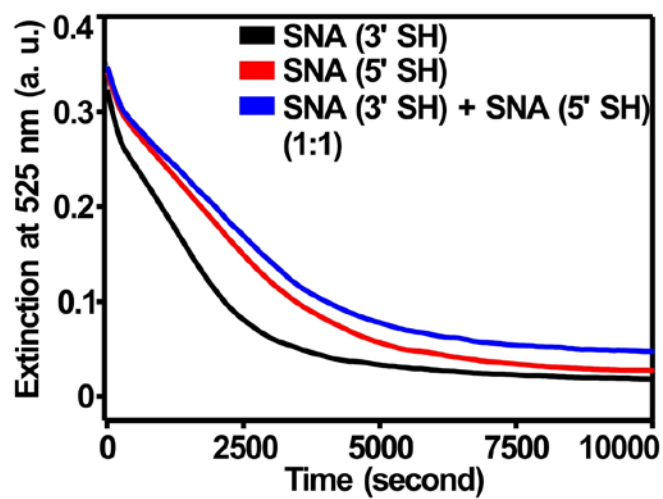

**Figure S6.** Assembly rates of SNAs composed of 3' thiol-S1 (black), S1 (5' thiol, red), and their 1:1 mixture (blue) in the presence of  $\text{Cu}^{2+}$  (1 mM).



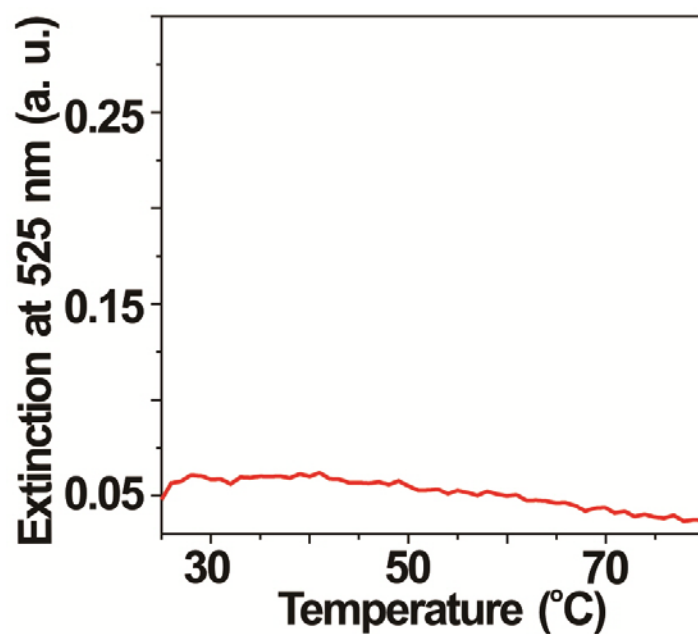

**Figure S7.** A graph showing the extinction of  $\text{Cu}^{2+}$ -induced SNA assemblies (**S1**) at 525 nm as a function of temperature ( $[\text{SNA}] = 1 \text{ nM}$  and  $[\text{Cu}^{2+}] = 1 \text{ mM}$ ). Note that practically no thermal dissociation of the SNA assemblies took place in the absence of EDTA.

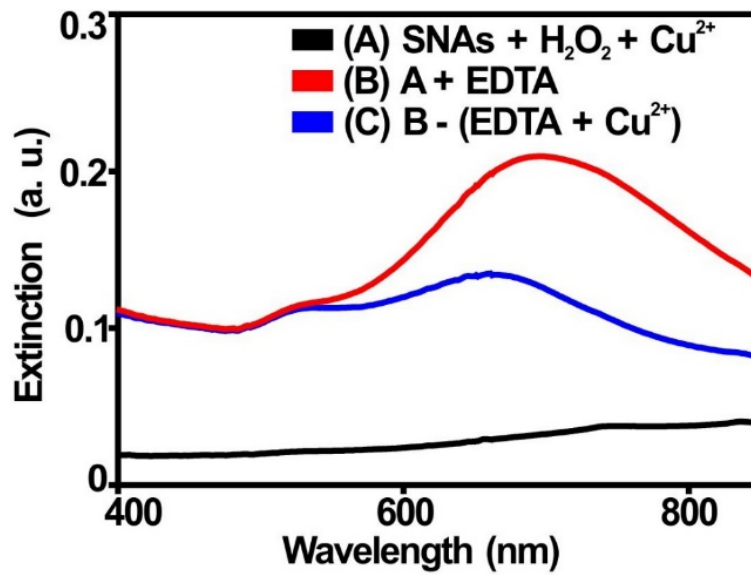

**Figure S8.** The UV-vis spectra of (A) SNAs (S1, 1 nM) combined with H<sub>2</sub>O<sub>2</sub> (28 mM) and Cu<sup>2+</sup> (0.5 mM) at 70 °C, (B) and subsequently combined with EDTA (1 mM). (C) To eliminate the contribution of Cu<sup>2+</sup>-EDTA complex to the UV-vis spectrum in (B), the UV-vis spectrum of a separately prepared mixture of EDTA and Cu<sup>2+</sup> at the same concentrations was obtained, and was reduced from the spectrum in (B). Note that the extinction at 525 nm is not recovered even after the addition of EDTA, indicating that the SNAs are irreversibly assembled.
